# Supplementary material for: Effects of Saccharomyces cerevisiae and phytase co-fermentation of wheat bran on growth, antioxidation, immunity and intestinal morphology in broilers
Source: PubMed Central journal article supplement (PMC8255880; doi:10.5713/ajas.20.0399), 2020-10-13
Supplement: ajas-20-0399-suppl.pdf [file ajas-20-0399-suppl.pdf]

1 **Electronic Supplements**

2

3 **Supplements figure captions**

4 Supplement figure 1. The extractable phosphorus ( $\mu\text{mol/g DM}$ ) of wheat bran (WB)  
5 with different treatments. Wheat bran (WB), wheat branfermented by *Saccharomyces*  
6 *cerevisiae* without phytase (SC), 500 FTU phytase per kilogram wheat bran  
7 (WB+phytase) and 500 FTU phytase per kilogram *Saccharomyces cerevisiae*  
8 fermented wheat bran (FWB). <sup>a,b</sup>Means within the same rows without the same  
9 superscript letter are significantly different ( $P < 0.05$ ).

10

11 Supplement figure 2. Nitric oxide release amount of phosphate buffer solution (PBS,  
12 control), 1 ng/ml lipopolysaccharide (LPBS, negative control), 50 mg/mL FWB  
13 extraction and 1 ng/ml LPS included (50 mg/ml LFWB) and 100 mg/mL FWB  
14 extraction and 1 ng/ml LPS included (100 mg/ml LFWB). <sup>a,b</sup>Means within the same  
15 rows without the same superscript letter are significantly different ( $P < 0.05$ ).

16

17 Supplement figure 3. MTT assay of phosphate buffer solution (PBS, control), PBS  
18 and 1 ng/ml lipopolysaccharide (LPBS, negative control), 50 mg/mL FWB extraction  
19 and 1 ng/ml LPS included (50 mg/ml LFWB) and 100 mg/mL FWB extraction and 1  
20 ng/ml LPS included (100 mg/ml LFWB). <sup>a,b</sup>Means within the same rows without the  
21 same superscript letter are significantly different ( $P < 0.05$ ).

22

23 Supplement figure 4. Photomicrography of jejunum and ileum of 35-day-old broilers  
24 fed with control, WB and FWB. (A-E) jejunum, respectively control, 5% WB, 5%  
25 FWB, 10% WB, and 10% FWB. (F-J) ileum, respectively control, 5% WB, 5% FWB,  
26 10% WB, and 10% FWB. Haematoxylin and eosin stain. 40 $\times$ .

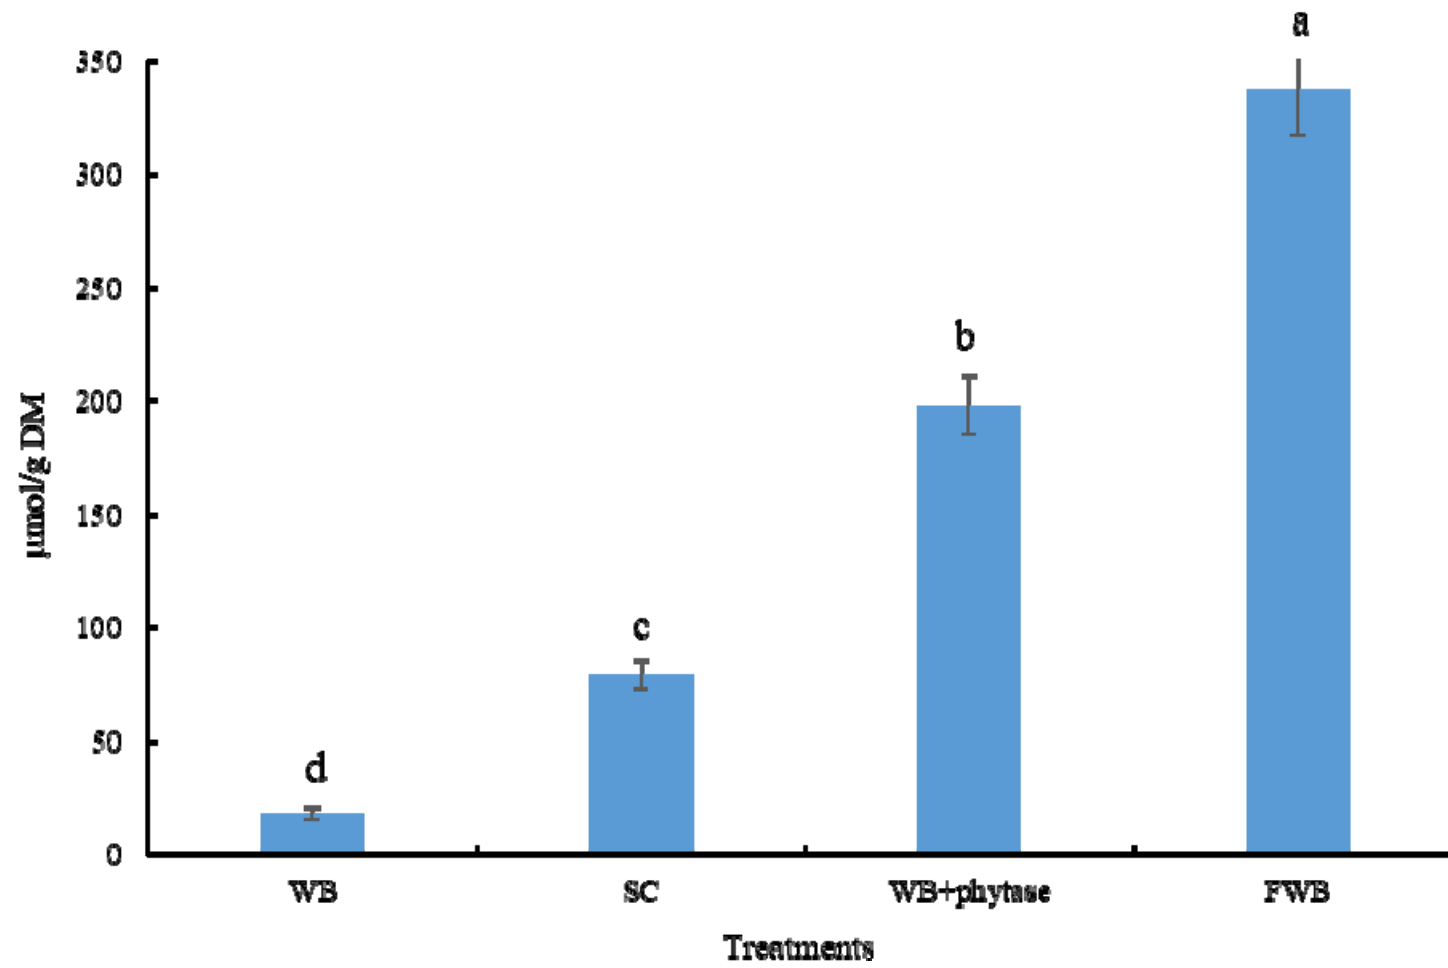

Supplement figure 1

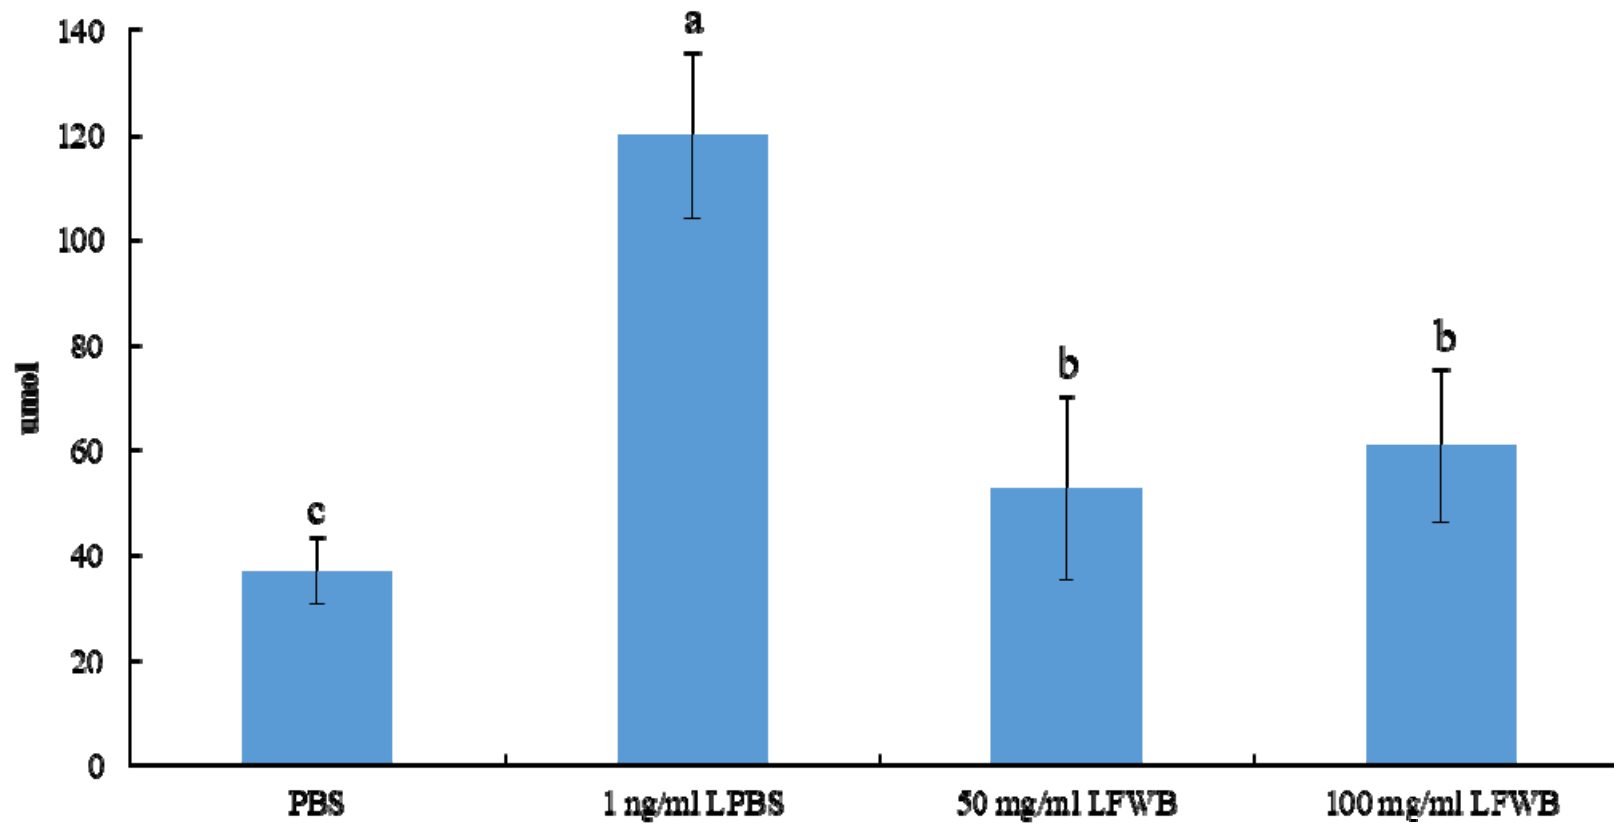

Supplement figure 2

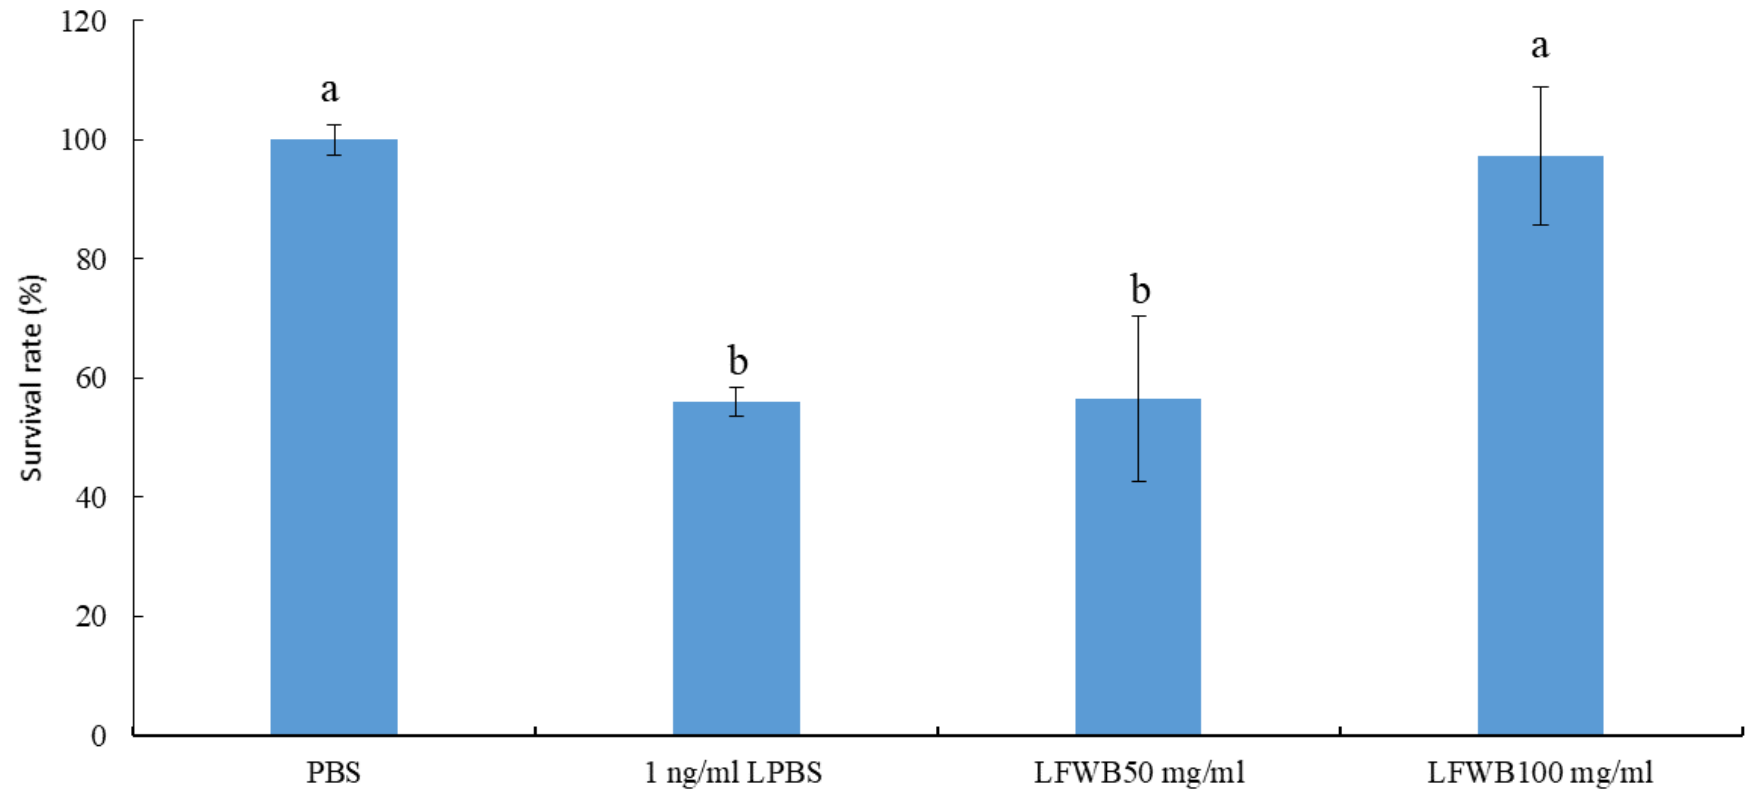

Supplement figure 3

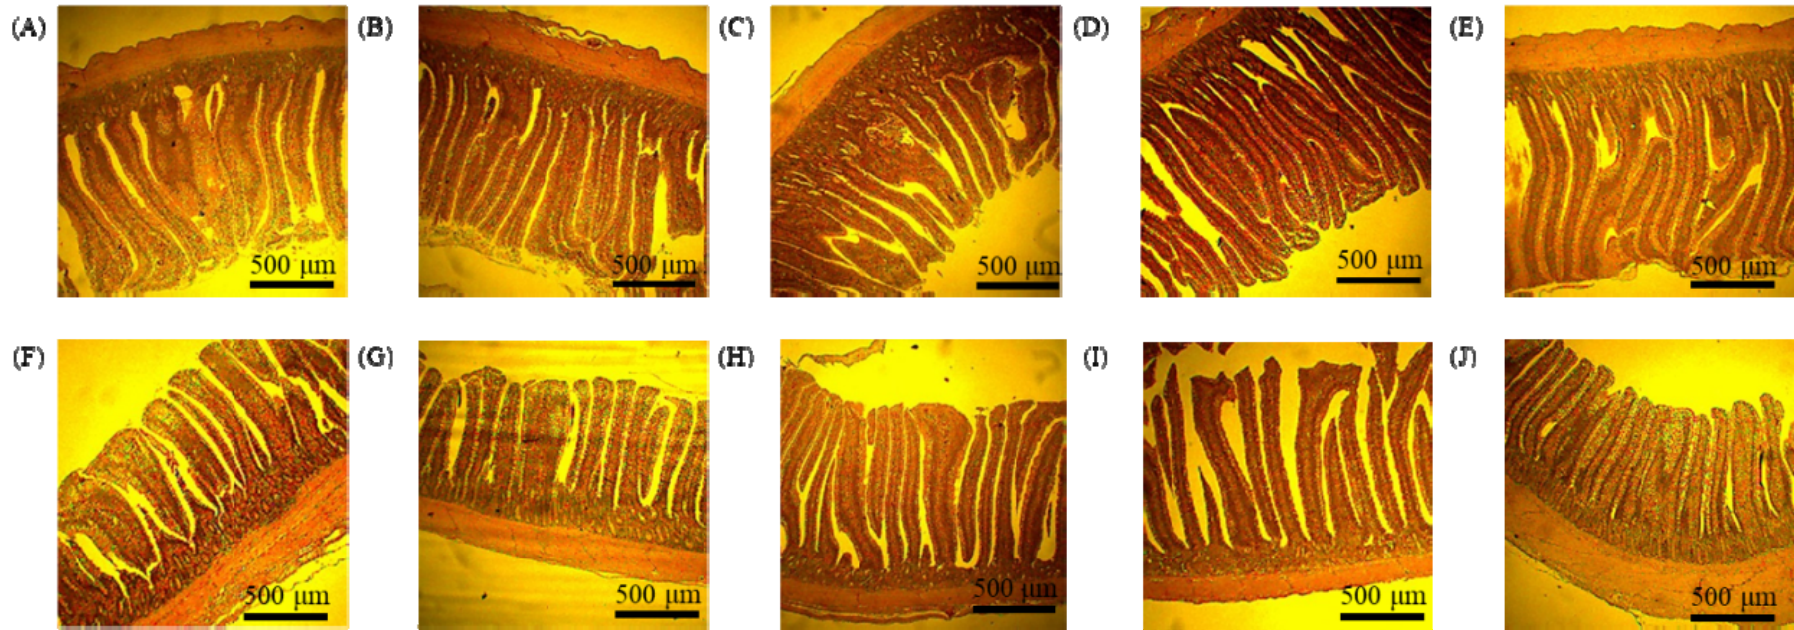

Supplement figure 4

27 Supplement table 1. The primer sequence of each gene according to genbank.

| Gene name <sup>1</sup> | Primer sequence                                                    | Genbank No.    |
|------------------------|--------------------------------------------------------------------|----------------|
| β-actin                | F: 5'-CTGGCACCTAGCACAATGAA-3'<br>R: 5'-ACATCTGCTGGAAGGTGGAC-3'     | X00182.1       |
| MUC-2                  | F: 5'-GCTACAGGATCTGCCTTTGC-3'<br>R: 5'-AATGGGCCCTCTGAGTTTTT-3'     | JX284122.1     |
| Occludin               | F: 5'-GTCTGTGGGTTCCCTCATCGT-3'<br>R: 5'-GTTCTTCACCCACTCCTCCA-3'    | NM_205128.1    |
| Claudin-1              | F: 5'-GGAGGATGACCAGGTGAAGA-3'<br>R: 5'-TCTGGTGTTAACGGGTGTGA-3'     | NM_001013611.2 |
| ZO-1                   | F: 5'-AGGTGAAGTGTTTCGGGTTG-3'<br>R: 5'-CCTCCTGCTGTCTTTGGAAG-3'     | XM_015278975.1 |
| NOX-1                  | F: 5'-CAATGCAGCACTCCACTTTG-3'<br>R: 5'-GACAAGATCTCCGCAAGACC-3'     | NM_001101830.1 |
| Nrf-2                  | F: 5'-GGAAGAAGGTGCGTTTCGGAGC-3'<br>R: 5'-GGGCAAGGCAGATCTCTTCCAA-3' | NM_205117.1    |
| HO-1                   | F: 5'-GGTCCCGAATGAATGCCCTTG-3'<br>R: 5'-ACCGTTCTCCTGGCTCTTGG-3'    | NM_205344.1    |
| GCLC                   | F: 5'-CAGCACCCAGACTACAAGCA-3'<br>R: 5'-CTACCCCAACAGTTCTGGA-3'      | XM_419910.3    |
| IL-6                   | F: 5'-AGGACGAGATGTGCAAGAAGTTC-3'<br>R: 5'-TTGGGCAGGTTGAGGTTGTT-3'  | NM_204628      |
| iNOS                   | F: 5'-TACTGCGTGTCTTTCAACG-3'<br>R: 5'-CCCATTCTTCTTCCAACCTC-3'      | U46504         |
| NFκB                   | F: 5'-CCAGGTTGCCATCGTGTTCC-3'<br>R: 5'-GCGTGCGTTTGCCTTCT-3'        | D13719.1       |
| COX-2                  | F: 5'-TGTCCTTTCCTGCTTTCCAT-3'<br>R: 5'-TTCCATTGCTGTGTTTGAGGT-3'    | NM_001167718.1 |
| IL-1β                  | F: 5'-GCTCTACATGTCGTGTGTGATGAG-3'<br>R: 5'-TGTCGATGTCCCGCATGA-3'   | NM_204524      |
| IFN-γ                  | F: 5'-CTCCCGATGAACGACTTGAG-3'<br>R: 5'-CTGAGACTGGCTCCTTTTCC-3'     | Y07922         |

28 <sup>1</sup> MUC2: Mucin2; ZO-1: Zonula occludens; NOX-1: NADPH oxidase-1; Nrf-2:  
 29 Nuclear factor erythroid 2-related factor 2; HO-1: Heme oxygenase-1; GCLC:  
 30 Glutamate-cysteine ligase catalytic; IL-6: Interleukin-6; iNOS: Inducible nitric oxide  
 31 synthases; NFκB: Nuclear factor kappa B p 65; COX-2: Cyclooxygenase-2; IL-1β:  
 32 Interleukin-1β; IFN-γ: Interferon-γ.

33 Supplement table 2. The enzyme activities, carbohydrate and proximate analysis of  
 34 *Saccharomyces cerevisiae* and phytase co-fermented wheat bran (FWB).

|                                 | Products            |                  |
|---------------------------------|---------------------|------------------|
|                                 | WB <sup>1</sup>     | FWB <sup>2</sup> |
| Enzymes                         | -----U/g DM-----    |                  |
| Xylanase <sup>3</sup>           | ND <sup>4</sup>     | 152.76           |
| Protease <sup>5</sup>           | ND                  | 549.23           |
| Cellulase <sup>6</sup>          | ND                  | 289.49           |
| β-glucanase <sup>7</sup>        | ND                  | 147.07           |
| Oligosaccharides                | ----- mg/g DM ----- |                  |
| Pentose                         | 75.3±0.38           | 193.80±19.99     |
| Hexose                          | 127.4±3.46          | 297.50±33.12     |
| D-xylose                        | ND <sup>3</sup>     | 16.01±1.24       |
| Xylobiose                       | ND                  | 21.47±1.89       |
| Xylotriose                      | ND                  | 16.23±3.11       |
| Proximate analysis <sup>8</sup> | reviewer idea:      |                  |
| DM (%)                          | 91.5±0.02           | 91.7±0.01        |
| CP (% DM)                       | 17.8±0.84           | 20.3±1.23        |
| NDF (% DM)                      | 42.4±1.64           | 44.9±0.16        |
| ADF (% DM)                      | 15.5±0.30           | 14.7±0.37        |
| Ash (% DM)                      | 5.15±0.08           | 5.90±0.37        |
| EE (% DM)                       | 4.08±0.02           | 4.24±0.05        |

35 <sup>1</sup> WB: wheat bran.

36 <sup>2</sup> FWB: *Saccharomyces cerevisiae* and phytase co-fermented wheat bran.

37 <sup>3</sup> One unit of xylanase activity is defined as 1 μmol D-xylose is generated from 10  
 38 mg/ml xylan in the condition of 37°C and pH 5.5 in a minute.

39 <sup>4</sup>No detectable.

40 <sup>5</sup>One unit of protease activity is defined as 1 μg L-tyrosine is generated from 10  
 41 mg/ml casein in the condition of 40°C and pH 7.5 in a minute.

42 <sup>6</sup> One unit of cellulase activity is defined as 1 μmol reducing sugar is generated from  
 43 10 mg/ml CMC in the condition of 37°C and pH 5.5 in a minute.

44 <sup>7</sup> One unit of β-glucanase activity is defined as 1 μmol reducing sugar is generated  
 45 from 5 mg/ml β-glucan in the condition of 37°C and pH 5.5 in a minute.

46 <sup>8</sup> DM: Dry matter; CP: Crude protein; NDF: Neutral detergent fiber; ADF: Acid  
 47 detergent fiber; EE: Ether extra.
